# Supplementary material for: Non-native fish of the Upper Irtysh and the Ulungur Rivers in China
Source: Biodivers Data J. 2023 Jan 17;11:e97884. doi: 10.3897/BDJ.11.e97884 (PMC10848362; doi:10.3897/BDJ.11.e97884)
Supplement: Supplementary material 1 — Fish taxon-occurrences [file bdj-11-e97884-s001.csv]

occurrenceID	catalogNumber	basisOfRecord	eventDate	scientificName	kingdom	phylum	class	order	family	subfamily	genus	taxonRank	ownerInstitutionCode	individualCount	recordedBy	identifiedBy	decimalLatitude	decimalLongitude	maximumElevationInMeters	geodeticDatum	coordinateUncertaintyInMeters	locality	country	stateProvince	municipality	waterBody
catalog:DQ:Fish:001	XJ-AL2013001	PreservedSpecimen	2013-09-04	Pseudorasbora parva (Temminck & Schlegel, 1846)	Animalia	Chordata	Osteichthyes	Cypriniformes	Gobionidae		Pseudorasbora	species	ASIZB	2	Chunguang Zhang | Tianci Zhang | Xiaojing Song | Yaming Bao	Chunguang Zhang | Tianci Zhang	46.05	90.14	909	WGS84	787	Qinggil	China	Xinjiang Uygur Autonomous Region	Altay Prefecture	Ulungur River
catalog:DQ:Fish:002	XJ-AL2013002	PreservedSpecimen	2013-09-05	Cyprinus carpio Linnaeus, 1758	Animalia	Chordata	Osteichthyes	Cypriniformes	Cyprinidae	Cyprininae	Cyprinus	species	ASIZB	1	Chunguang Zhang | Tianci Zhang | Xiaojing Song | Yaming Bao	Chunguang Zhang | Tianci Zhang	46.17	90.83	1109	WGS84	787	Qinggil	China	Xinjiang Uygur Autonomous Region	Altay Prefecture	Burgen River
catalog:DQ:Fish:003	XJ-AL2013003	PreservedSpecimen	2013-09-05	Pseudorasbora parva (Temminck & Schlegel, 1846)	Animalia	Chordata	Osteichthyes	Cypriniformes	Gobionidae		Pseudorasbora	species	ASIZB	13	Chunguang Zhang | Tianci Zhang | Xiaojing Song | Yaming Bao	Chunguang Zhang | Tianci Zhang	46.17	90.83	1109	WGS84	787	Qinggil	China	Xinjiang Uygur Autonomous Region	Altay Prefecture	Burgen River
catalog:DQ:Fish:004	XJ-AL2013004	PreservedSpecimen	2013-09-05	Pseudorasbora parva (Temminck & Schlegel, 1846)	Animalia	Chordata	Osteichthyes	Cypriniformes	Gobionidae		Pseudorasbora	species	ASIZB	1	Chunguang Zhang | Tianci Zhang | Xiaojing Song | Yaming Bao	Chunguang Zhang | Tianci Zhang	46.18	90.56	1060	WGS84	787	Qinggil	China	Xinjiang Uygur Autonomous Region	Altay Prefecture	Ulungur River
catalog:DQ:Fish:005	XJ-AL2013005	PreservedSpecimen	2013-09-05	Pseudorasbora parva (Temminck & Schlegel, 1846)	Animalia	Chordata	Osteichthyes	Cypriniformes	Gobionidae		Pseudorasbora	species	ASIZB	1	Chunguang Zhang | Tianci Zhang | Xiaojing Song | Yaming Bao	Chunguang Zhang | Tianci Zhang	46.48	90.22	1147	WGS84	787	Qinggil	China	Xinjiang Uygur Autonomous Region	Altay Prefecture	Ulungur River
catalog:DQ:Fish:006	XJ-AL2013006	PreservedSpecimen	2013-09-06	Pseudorasbora parva (Temminck & Schlegel, 1846)	Animalia	Chordata	Osteichthyes	Cypriniformes	Gobionidae		Pseudorasbora	species	ASIZB	12	Chunguang Zhang | Tianci Zhang | Xiaojing Song | Yaming Bao	Chunguang Zhang | Tianci Zhang	47.03	89.75	1335	WGS84	787	Fuyun	China	Xinjiang Uygur Autonomous Region	Altay Prefecture	Irtysh River
catalog:DQ:Fish:007	XJ-AL2013007	PreservedSpecimen	2013-09-06	Pseudorasbora parva (Temminck & Schlegel, 1846)	Animalia	Chordata	Osteichthyes	Cypriniformes	Gobionidae		Pseudorasbora	species	ASIZB	1	Chunguang Zhang | Tianci Zhang | Xiaojing Song | Yaming Bao	Chunguang Zhang | Tianci Zhang	46.34	89.54	809	WGS84	787	Fuyun	China	Xinjiang Uygur Autonomous Region	Altay Prefecture	Ulungur River
catalog:DQ:Fish:008	XJ-AL2013008	PreservedSpecimen	2013-09-06	Pseudorasbora parva (Temminck & Schlegel, 1846)	Animalia	Chordata	Osteichthyes	Cypriniformes	Gobionidae		Pseudorasbora	species	ASIZB	1	Chunguang Zhang | Tianci Zhang | Xiaojing Song | Yaming Bao	Chunguang Zhang | Tianci Zhang	46.46	89.26	775	WGS84	787	Fuyun	China	Xinjiang Uygur Autonomous Region	Altay Prefecture	Ulungur River
catalog:DQ:Fish:009	XJ-AL2013009	PreservedSpecimen	2013-09-07	Pseudorasbora parva (Temminck & Schlegel, 1846)	Animalia	Chordata	Osteichthyes	Cypriniformes	Gobionidae		Pseudorasbora	species	ASIZB	1	Chunguang Zhang | Tianci Zhang | Xiaojing Song | Yaming Bao	Chunguang Zhang | Tianci Zhang	47.37	87.82	495	WGS84	787	Altay	China	Xinjiang Uygur Autonomous Region	Altay Prefecture	Irtysh River
catalog:DQ:Fish:010	XJ-AL2013010	PreservedSpecimen	2013-09-07	Pseudorasbora parva (Temminck & Schlegel, 1846)	Animalia	Chordata	Osteichthyes	Cypriniformes	Gobionidae		Pseudorasbora	species	ASIZB	2	Chunguang Zhang | Tianci Zhang | Xiaojing Song | Yaming Bao	Chunguang Zhang | Tianci Zhang	46.55	88.47	651	WGS84	787	Fuyun	China	Xinjiang Uygur Autonomous Region	Altay Prefecture	Ulungur River
catalog:DQ:Fish:011	XJ-AL2013011	PreservedSpecimen	2013-09-08	Abramis brama (Linnaeus, 1758)	Animalia	Chordata	Osteichthyes	Cypriniformes	Leuciscidae	Leuciscinae	Abramis	species	ASIZB	1	Chunguang Zhang | Tianci Zhang | Xiaojing Song | Yaming Bao	Chunguang Zhang | Tianci Zhang	47.74	87.51	507	WGS84	787	Altay	China	Xinjiang Uygur Autonomous Region	Altay Prefecture	Alahake River
catalog:DQ:Fish:012	XJ-AL2013012	PreservedSpecimen	2013-09-08	Cyprinus carpio Linnaeus, 1758	Animalia	Chordata	Osteichthyes	Cypriniformes	Cyprinidae	Cyprininae	Cyprinus	species	ASIZB	8	Chunguang Zhang | Tianci Zhang | Xiaojing Song | Yaming Bao	Chunguang Zhang | Tianci Zhang	47.74	87.51	507	WGS84	787	Altay	China	Xinjiang Uygur Autonomous Region	Altay Prefecture	Alahake River
catalog:DQ:Fish:013	XJ-AL2013013	PreservedSpecimen	2013-09-08	Pseudorasbora parva (Temminck & Schlegel, 1846)	Animalia	Chordata	Osteichthyes	Cypriniformes	Gobionidae		Pseudorasbora	species	ASIZB	23	Chunguang Zhang | Tianci Zhang | Xiaojing Song | Yaming Bao	Chunguang Zhang | Tianci Zhang	47.74	87.51	507	WGS84	787	Altay	China	Xinjiang Uygur Autonomous Region	Altay Prefecture	Alahake River
catalog:DQ:Fish:014	XJ-AL2013014	PreservedSpecimen	2013-09-08	Misgurnus anguillicaudatus (Cantor, 1842)	Animalia	Chordata	Osteichthyes	Cypriniformes	Cobitidae		Misgurnus	species	ASIZB	1	Chunguang Zhang | Tianci Zhang | Xiaojing Song | Yaming Bao	Chunguang Zhang | Tianci Zhang	47.74	87.51	507	WGS84	787	Altay	China	Xinjiang Uygur Autonomous Region	Altay Prefecture	Alahake River
catalog:DQ:Fish:015	XJ-AL2013015	PreservedSpecimen	2013-09-10	Abbottina rivularis (Basilewsky, 1855)	Animalia	Chordata	Osteichthyes	Cypriniformes	Gobionidae		Abbottina	species	ASIZB	2	Chunguang Zhang | Tianci Zhang | Xiaojing Song | Yaming Bao	Chunguang Zhang | Tianci Zhang	47.72	86.84	470	WGS84	787	Burqin	China	Xinjiang Uygur Autonomous Region	Altay Prefecture	Buerjin River
catalog:DQ:Fish:016	XJ-AL2013016	PreservedSpecimen	2013-09-10	Abramis brama (Linnaeus, 1758)	Animalia	Chordata	Osteichthyes	Cypriniformes	Leuciscidae	Leuciscinae	Abramis	species	ASIZB	12	Chunguang Zhang | Tianci Zhang | Xiaojing Song | Yaming Bao	Chunguang Zhang | Tianci Zhang	48.01	85.7	427	WGS84	787	Habahe	China	Xinjiang Uygur Autonomous Region	Altay Prefecture	Bieliezeke River
catalog:DQ:Fish:017	XJ-AL2013017	PreservedSpecimen	2013-09-10	Cyprinus carpio Linnaeus, 1758	Animalia	Chordata	Osteichthyes	Cypriniformes	Cyprinidae	Cyprininae	Cyprinus	species	ASIZB	2	Chunguang Zhang | Tianci Zhang | Xiaojing Song | Yaming Bao	Chunguang Zhang | Tianci Zhang	48.01	85.7	427	WGS84	787	Habahe	China	Xinjiang Uygur Autonomous Region	Altay Prefecture	Bieliezeke River
catalog:DQ:Fish:018	XJ-AL2013018	PreservedSpecimen	2013-09-10	Pseudorasbora parva (Temminck & Schlegel, 1846)	Animalia	Chordata	Osteichthyes	Cypriniformes	Gobionidae		Pseudorasbora	species	ASIZB	27	Chunguang Zhang | Tianci Zhang | Xiaojing Song | Yaming Bao	Chunguang Zhang | Tianci Zhang	47.72	86.84	470	WGS84	787	Burqin	China	Xinjiang Uygur Autonomous Region	Altay Prefecture	Buerjin River
catalog:DQ:Fish:019	XJ-AL2013019	PreservedSpecimen	2013-09-10	Sander lucioperca (Linnaeus, 1758)	Animalia	Chordata	Osteichthyes	Perciformes	Percidae	Luciopercinae	Sander	species	ASIZB	1	Chunguang Zhang | Tianci Zhang | Xiaojing Song | Yaming Bao	Chunguang Zhang | Tianci Zhang	48.01	85.7	427	WGS84	787	Habahe	China	Xinjiang Uygur Autonomous Region	Altay Prefecture	Bieliezeke River
catalog:DQ:Fish:020	XJ-AL2013020	PreservedSpecimen	2013-09-11	Ctenopharyngodon idella (Valenciennes, 1844)	Animalia	Chordata	Osteichthyes	Cypriniformes	Xenocyprididae		Ctenopharyngodon	species	ASIZB	1	Chunguang Zhang | Tianci Zhang | Xiaojing Song | Yaming Bao	Chunguang Zhang | Tianci Zhang	47.12	87.5	504	WGS84	787	Fuhai	China	Xinjiang Uygur Autonomous Region	Altay Prefecture	Ulungur River
catalog:DQ:Fish:021	XJ-AL2013021	PreservedSpecimen	2013-09-11	Abramis brama (Linnaeus, 1758)	Animalia	Chordata	Osteichthyes	Cypriniformes	Leuciscidae	Leuciscinae	Abramis	species	ASIZB	11	Chunguang Zhang | Tianci Zhang | Xiaojing Song | Yaming Bao	Chunguang Zhang | Tianci Zhang	47.12	87.5	504	WGS84	787	Fuhai	China	Xinjiang Uygur Autonomous Region	Altay Prefecture	Ulungur River
catalog:DQ:Fish:022	XJ-AL2013022	PreservedSpecimen	2013-09-11	Cyprinus carpio Linnaeus, 1758	Animalia	Chordata	Osteichthyes	Cypriniformes	Cyprinidae	Cyprininae	Cyprinus	species	ASIZB	1	Chunguang Zhang | Tianci Zhang | Xiaojing Song | Yaming Bao	Chunguang Zhang | Tianci Zhang	47.12	87.5	504	WGS84	787	Fuhai	China	Xinjiang Uygur Autonomous Region	Altay Prefecture	Ulungur River
catalog:DQ:Fish:023	XJ-AL2013023	PreservedSpecimen	2013-09-11	Pseudorasbora parva (Temminck & Schlegel, 1846)	Animalia	Chordata	Osteichthyes	Cypriniformes	Gobionidae		Pseudorasbora	species	ASIZB	5	Chunguang Zhang | Tianci Zhang | Xiaojing Song | Yaming Bao	Chunguang Zhang | Tianci Zhang	47.12	87.5	504	WGS84	787	Fuhai	China	Xinjiang Uygur Autonomous Region	Altay Prefecture	Ulungur River
catalog:DQ:Fish:024	XJ-AL2013024	PreservedSpecimen	2013-09-11	Sander lucioperca (Linnaeus, 1758)	Animalia	Chordata	Osteichthyes	Perciformes	Percidae	Luciopercinae	Sander	species	ASIZB	2	Chunguang Zhang | Tianci Zhang | Xiaojing Song | Yaming Bao	Chunguang Zhang | Tianci Zhang	47.12	87.5	504	WGS84	787	Fuhai	China	Xinjiang Uygur Autonomous Region	Altay Prefecture	Ulungur River
catalog:DQ:Fish:025	XJ-AL2014001	PreservedSpecimen	2014-09-12	Abbottina rivularis (Basilewsky, 1855)	Animalia	Chordata	Osteichthyes	Cypriniformes	Gobionidae		Abbottina	species	ASIZB	3	Chunguang Zhang | Xingchun Xing | Binbin Lv | Haolin Li | Jingming Liu	Chunguang Zhang | Haolin Li	48.0072	85.7031	434	WGS84	8	Habahe	China	Xinjiang Uygur Autonomous Region	Altay Prefecture	Bieliezeke River
catalog:DQ:Fish:026	XJ-AL2014002	PreservedSpecimen	2014-09-12	Abramis brama (Linnaeus, 1758)	Animalia	Chordata	Osteichthyes	Cypriniformes	Leuciscidae	Leuciscinae	Abramis	species	ASIZB	17	Chunguang Zhang | Xingchun Xing | Binbin Lv | Haolin Li | Jingming Liu	Chunguang Zhang | Haolin Li	48.0072	85.7031	434	WGS84	8	Habahe	China	Xinjiang Uygur Autonomous Region	Altay Prefecture	Bieliezeke River
catalog:DQ:Fish:027	XJ-AL2014003	PreservedSpecimen	2014-09-12	Pseudorasbora parva (Temminck & Schlegel, 1846)	Animalia	Chordata	Osteichthyes	Cypriniformes	Gobionidae		Pseudorasbora	species	ASIZB	1	Chunguang Zhang | Xingchun Xing | Binbin Lv | Haolin Li | Jingming Liu	Chunguang Zhang | Haolin Li	48.0072	85.7031	434	WGS84	8	Habahe	China	Xinjiang Uygur Autonomous Region	Altay Prefecture	Bieliezeke River
catalog:DQ:Fish:028	XJ-AL2014004	PreservedSpecimen	2014-09-13	Abbottina rivularis (Basilewsky, 1855)	Animalia	Chordata	Osteichthyes	Cypriniformes	Gobionidae		Abbottina	species	ASIZB	2	Chunguang Zhang | Xingchun Xing | Binbin Lv | Haolin Li | Jingming Liu	Chunguang Zhang | Haolin Li	48.0147	85.5708	421	WGS84	8	Habahe	China	Xinjiang Uygur Autonomous Region	Altay Prefecture	Irtysh River
catalog:DQ:Fish:029	XJ-AL2014005	PreservedSpecimen	2014-09-13	Misgurnus dabryanus (Dabry de Thiersant, 1872)	Animalia	Chordata	Osteichthyes	Cypriniformes	Cobitidae		Misgurnus	species	ASIZB	1	Chunguang Zhang | Xingchun Xing | Binbin Lv | Haolin Li | Jingming Liu	Chunguang Zhang | Haolin Li	48.0147	85.5708	421	WGS84	8	Habahe	China	Xinjiang Uygur Autonomous Region	Altay Prefecture	Irtysh River
catalog:DQ:Fish:030	XJ-AL2014006	PreservedSpecimen	2014-09-13	Pseudorasbora parva (Temminck & Schlegel, 1846)	Animalia	Chordata	Osteichthyes	Cypriniformes	Gobionidae		Pseudorasbora	species	ASIZB	3	Chunguang Zhang | Xingchun Xing | Binbin Lv | Haolin Li | Jingming Liu	Chunguang Zhang | Haolin Li	47.9986	85.6992	422	WGS84	8	Habahe	China	Xinjiang Uygur Autonomous Region	Altay Prefecture	Bieliezeke River
catalog:DQ:Fish:031	XJ-AL2014007	PreservedSpecimen	2014-09-14	Abbottina rivularis (Basilewsky, 1855)	Animalia	Chordata	Osteichthyes	Cypriniformes	Gobionidae		Abbottina	species	ASIZB	3	Chunguang Zhang | Xingchun Xing | Binbin Lv | Haolin Li | Jingming Liu	Chunguang Zhang | Haolin Li	47.7375	86.8139	442	WGS84	8	Burqin	China	Xinjiang Uygur Autonomous Region	Altay Prefecture	Irtysh River
catalog:DQ:Fish:032	XJ-AL2014008	PreservedSpecimen	2014-09-14	Pseudorasbora parva (Temminck & Schlegel, 1846)	Animalia	Chordata	Osteichthyes	Cypriniformes	Gobionidae		Pseudorasbora	species	ASIZB	25	Chunguang Zhang | Xingchun Xing | Binbin Lv | Haolin Li | Jingming Liu	Chunguang Zhang | Haolin Li	47.7375	86.8139	442	WGS84	8	Burqin	China	Xinjiang Uygur Autonomous Region	Altay Prefecture	Irtysh River
catalog:DQ:Fish:033	XJ-AL2014009	PreservedSpecimen	2014-09-14	Misgurnus anguillicaudatus (Cantor, 1842)	Animalia	Chordata	Osteichthyes	Cypriniformes	Cobitidae		Misgurnus	species	ASIZB	4	Chunguang Zhang | Xingchun Xing | Binbin Lv | Haolin Li | Jingming Liu	Chunguang Zhang | Haolin Li	47.7375	86.8139	442	WGS84	8	Burqin	China	Xinjiang Uygur Autonomous Region	Altay Prefecture	Irtysh River
catalog:DQ:Fish:034	XJ-AL2014010	PreservedSpecimen	2014-09-14	Micropercops swinhonis (Günther, 1873)	Animalia	Chordata	Osteichthyes	Gobiiformes	Odontobutidae		Micropercops	species	ASIZB	6	Chunguang Zhang | Xingchun Xing | Binbin Lv | Haolin Li | Jingming Liu	Chunguang Zhang | Haolin Li	47.7375	86.8139	442	WGS84	8	Burqin	China	Xinjiang Uygur Autonomous Region	Altay Prefecture	Irtysh River
catalog:DQ:Fish:035	XJ-AL2014011	PreservedSpecimen	2014-09-18	Pseudorasbora parva (Temminck & Schlegel, 1846)	Animalia	Chordata	Osteichthyes	Cypriniformes	Gobionidae		Pseudorasbora	species	ASIZB	10	Chunguang Zhang | Xingchun Xing | Binbin Lv | Haolin Li | Jingming Liu	Chunguang Zhang | Haolin Li	46.4567	90.2428	1150	WGS84	8	Qinggil	China	Xinjiang Uygur Autonomous Region	Altay Prefecture	Ulungur River
catalog:DQ:Fish:036	XJ-AL2014012	PreservedSpecimen	2014-09-18	Pseudorasbora parva (Temminck & Schlegel, 1846)	Animalia	Chordata	Osteichthyes	Cypriniformes	Gobionidae		Pseudorasbora	species	ASIZB	6	Chunguang Zhang | Xingchun Xing | Binbin Lv | Haolin Li | Jingming Liu	Chunguang Zhang | Haolin Li	46.0525	90.1483	915	WGS84	8	Qinggil	China	Xinjiang Uygur Autonomous Region	Altay Prefecture	Ulungur River
catalog:DQ:Fish:037	XJ-AL2015001	PreservedSpecimen	2015-07-19	Pseudorasbora parva (Temminck & Schlegel, 1846)	Animalia	Chordata	Osteichthyes	Cypriniformes	Gobionidae		Pseudorasbora	species	ASIZB	4	Chunguang Zhang | Haolin Li | Xuejian Li	Yahui Zhao | Xuejian Li	47.7369	86.9931	508	WGS84	8	Burqin	China	Xinjiang Uygur Autonomous Region	Altay Prefecture	Buerjin River
catalog:DQ:Fish:038	XJ-AL2015002	PreservedSpecimen	2015-07-19	Micropercops swinhonis (Günther, 1873)	Animalia	Chordata	Osteichthyes	Gobiiformes	Odontobutidae		Micropercops	species	ASIZB	1	Chunguang Zhang | Haolin Li | Xuejian Li	Yahui Zhao | Xuejian Li	47.7369	86.9931	508	WGS84	8	Burqin	China	Xinjiang Uygur Autonomous Region	Altay Prefecture	Buerjin River
catalog:DQ:Fish:039	XJ-AL2015003	PreservedSpecimen	2015-07-19	Pseudorasbora parva (Temminck & Schlegel, 1846)	Animalia	Chordata	Osteichthyes	Cypriniformes	Gobionidae		Pseudorasbora	species	ASIZB	20	Chunguang Zhang | Haolin Li | Xuejian Li	Yahui Zhao | Xuejian Li	47.0453	87.6358	515	WGS84	8	Fuhai	China	Xinjiang Uygur Autonomous Region	Altay Prefecture	Ulungur River
catalog:DQ:Fish:040	XJ-AL2015004	PreservedSpecimen	2015-07-19	Micropercops swinhonis (Günther, 1873)	Animalia	Chordata	Osteichthyes	Gobiiformes	Odontobutidae		Micropercops	species	ASIZB	2	Chunguang Zhang | Haolin Li | Xuejian Li	Yahui Zhao | Xuejian Li	47.0453	87.6358	515	WGS84	8	Fuhai	China	Xinjiang Uygur Autonomous Region	Altay Prefecture	Ulungur River
catalog:DQ:Fish:041	XJ-AL2015005	PreservedSpecimen	2015-07-19	Triplophysa strauchii (Kessler, 1874)	Animalia	Chordata	Osteichthyes	Cypriniformes	Nemacheilidae		Triplophysa	species	ASIZB	3	Chunguang Zhang | Haolin Li | Xuejian Li	Yahui Zhao | Xuejian Li	47.0453	87.6358	515	WGS84	8	Fuhai	China	Xinjiang Uygur Autonomous Region	Altay Prefecture	Ulungur River
catalog:DQ:Fish:042	XJ-AL2015006	PreservedSpecimen	2015-07-19	Hedinichthys minuta (Li, 1966)	Animalia	Chordata	Osteichthyes	Cypriniformes	Nemacheilidae		Hedinichthys	species	ASIZB	7	Chunguang Zhang | Haolin Li | Xuejian Li	Yahui Zhao | Xuejian Li	47.0453	87.6358	515	WGS84	8	Fuhai	China	Xinjiang Uygur Autonomous Region	Altay Prefecture	Ulungur River
catalog:DQ:Fish:043	XJ-AL2015007	PreservedSpecimen	2015-07-19	Hedinichthys minuta (Li, 1966)	Animalia	Chordata	Osteichthyes	Cypriniformes	Nemacheilidae		Hedinichthys	species	ASIZB	3	Chunguang Zhang | Haolin Li | Xuejian Li	Yahui Zhao | Xuejian Li	47.7369	86.9931	508	WGS84	8	Burqin	China	Xinjiang Uygur Autonomous Region	Altay Prefecture	Buerjin River
catalog:DQ:Fish:044	XJ-AL2015008	PreservedSpecimen	2015-07-20	Abramis brama (Linnaeus, 1758)	Animalia	Chordata	Osteichthyes	Cypriniformes	Leuciscidae	Leuciscinae	Abramis	species	ASIZB	10	Chunguang Zhang | Haolin Li | Xuejian Li	Yahui Zhao | Xuejian Li	47.9911	85.7686	424	WGS84	8	Habahe	China	Xinjiang Uygur Autonomous Region	Altay Prefecture	Irtysh River
catalog:DQ:Fish:045	XJ-AL2015009	PreservedSpecimen	2015-07-21	Hedinichthys minuta (Li, 1966)	Animalia	Chordata	Osteichthyes	Cypriniformes	Nemacheilidae		Hedinichthys	species	ASIZB	42	Chunguang Zhang | Haolin Li | Xuejian Li	Yahui Zhao | Xuejian Li	48.1375	86.3947	574	WGS84	8	Habahe	China	Xinjiang Uygur Autonomous Region	Altay Prefecture	Habahe River
catalog:DQ:Fish:046	XJ-AL2015010	PreservedSpecimen	2015-07-21	Hedinichthys minuta (Li, 1966)	Animalia	Chordata	Osteichthyes	Cypriniformes	Nemacheilidae		Hedinichthys	species	ASIZB	4	Chunguang Zhang | Haolin Li | Xuejian Li	Yahui Zhao | Xuejian Li	48.1136	87.1953	664	WGS84	8	Burqin	China	Xinjiang Uygur Autonomous Region	Altay Prefecture	Buerjin River
catalog:DQ:Fish:047	XJ-AL2015011	PreservedSpecimen	2015-07-22	Triplophysa strauchii (Kessler, 1874)	Animalia	Chordata	Osteichthyes	Cypriniformes	Nemacheilidae		Triplophysa	species	ASIZB	8	Chunguang Zhang | Haolin Li | Xuejian Li	Yahui Zhao | Xuejian Li	46.6833	87.7472	570	WGS84	8	Fuhai	China	Xinjiang Uygur Autonomous Region	Altay Prefecture	Ulungur River
catalog:DQ:Fish:048	XJ-AL2015012	PreservedSpecimen	2015-07-22	Abramis brama (Linnaeus, 1758)	Animalia	Chordata	Osteichthyes	Cypriniformes	Leuciscidae	Leuciscinae	Abramis	species	ASIZB	1	Chunguang Zhang | Haolin Li | Xuejian Li	Yahui Zhao | Xuejian Li	46.6833	87.7472	570	WGS84	8	Fuhai	China	Xinjiang Uygur Autonomous Region	Altay Prefecture	Ulungur River
catalog:DQ:Fish:049	XJ-AL2015013	PreservedSpecimen	2015-07-22	Pseudorasbora parva (Temminck & Schlegel, 1846)	Animalia	Chordata	Osteichthyes	Cypriniformes	Gobionidae		Pseudorasbora	species	ASIZB	40	Chunguang Zhang | Haolin Li | Xuejian Li	Yahui Zhao | Xuejian Li	46.6833	87.7472	570	WGS84	8	Fuhai	China	Xinjiang Uygur Autonomous Region	Altay Prefecture	Ulungur River
catalog:DQ:Fish:050	XJ-AL2015014	PreservedSpecimen	2015-07-22	Pseudorasbora parva (Temminck & Schlegel, 1846)	Animalia	Chordata	Osteichthyes	Cypriniformes	Gobionidae		Pseudorasbora	species	ASIZB	2	Chunguang Zhang | Haolin Li | Xuejian Li	Yahui Zhao | Xuejian Li	46.5097	88.5483	564	WGS84	8	Fuyun	China	Xinjiang Uygur Autonomous Region	Altay Prefecture	Ulungur River
catalog:DQ:Fish:051	XJ-AL2015015	PreservedSpecimen	2015-07-22	Micropercops swinhonis (Günther, 1873)	Animalia	Chordata	Osteichthyes	Gobiiformes	Odontobutidae		Micropercops	species	ASIZB	7	Chunguang Zhang | Haolin Li | Xuejian Li	Yahui Zhao | Xuejian Li	46.6833	87.7472	570	WGS84	8	Fuhai	China	Xinjiang Uygur Autonomous Region	Altay Prefecture	Ulungur River
catalog:DQ:Fish:052	XJ-AL2015016	PreservedSpecimen	2015-07-23/24	Pseudorasbora parva (Temminck & Schlegel, 1846)	Animalia	Chordata	Osteichthyes	Cypriniformes	Gobionidae		Pseudorasbora	species	ASIZB	1	Chunguang Zhang | Haolin Li | Xuejian Li	Yahui Zhao | Xuejian Li	47.5792	88.8497	812	WGS84	8	Fuhai	China	Xinjiang Uygur Autonomous Region	Altay Prefecture	Kuermutu River
catalog:DQ:Fish:053	XJ-AL2016001	PreservedSpecimen	2016-07-16/17	Abramis brama (Linnaeus, 1758)	Animalia	Chordata	Osteichthyes	Cypriniformes	Leuciscidae	Leuciscinae	Abramis	species	ASIZB	131	Chunguang Zhang | Yahui Zhao | Xuejian Li	Yahui Zhao | Xuejian Li	47.7186	86.8427	449	WGS84	8	Burqin	China	Xinjiang Uygur Autonomous Region	Altay Prefecture	Buerjin River
catalog:DQ:Fish:054	XJ-AL2016002	PreservedSpecimen	2016-07-16/17	Pseudorasbora parva (Temminck & Schlegel, 1846)	Animalia	Chordata	Osteichthyes	Cypriniformes	Gobionidae		Pseudorasbora	species	ASIZB	31	Chunguang Zhang | Yahui Zhao | Xuejian Li	Yahui Zhao | Xuejian Li	47.7186	86.8427	449	WGS84	8	Burqin	China	Xinjiang Uygur Autonomous Region	Altay Prefecture	Buerjin River
catalog:DQ:Fish:055	XJ-AL2016003	PreservedSpecimen	2016-07-16/17	Misgurnus anguillicaudatus (Cantor, 1842)	Animalia	Chordata	Osteichthyes	Cypriniformes	Cobitidae		Misgurnus	species	ASIZB	2	Chunguang Zhang | Yahui Zhao | Xuejian Li	Yahui Zhao | Xuejian Li	47.7186	86.8427	449	WGS84	8	Burqin	China	Xinjiang Uygur Autonomous Region	Altay Prefecture	Buerjin River
catalog:DQ:Fish:056	XJ-AL2016004	PreservedSpecimen	2016-07-16/17	Sander lucioperca (Linnaeus, 1758)	Animalia	Chordata	Osteichthyes	Perciformes	Percidae	Luciopercinae	Sander	species	ASIZB	1	Chunguang Zhang | Yahui Zhao | Xuejian Li	Yahui Zhao | Xuejian Li	47.7186	86.8427	449	WGS84	8	Burqin	China	Xinjiang Uygur Autonomous Region	Altay Prefecture	Buerjin River
catalog:DQ:Fish:057	XJ-AL2016005	PreservedSpecimen	2016-07-17	Ctenopharyngodon idella (Valenciennes, 1844)	Animalia	Chordata	Osteichthyes	Cypriniformes	Xenocyprididae		Ctenopharyngodon	species	ASIZB	1	Chunguang Zhang | Yahui Zhao | Xuejian Li	Yahui Zhao | Xuejian Li	47.9911	85.7714	427	WGS84	8	Habahe	China	Xinjiang Uygur Autonomous Region	Altay Prefecture	Irtysh River
catalog:DQ:Fish:058	XJ-AL2016006	PreservedSpecimen	2016-07-17	Abramis brama (Linnaeus, 1758)	Animalia	Chordata	Osteichthyes	Cypriniformes	Leuciscidae	Leuciscinae	Abramis	species	ASIZB	66	Chunguang Zhang | Yahui Zhao | Xuejian Li	Yahui Zhao | Xuejian Li	47.9911	85.7714	427	WGS84	8	Habahe	China	Xinjiang Uygur Autonomous Region	Altay Prefecture	Irtysh River
catalog:DQ:Fish:059	XJ-AL2016007	PreservedSpecimen	2016-07-17	Cyprinus carpio Linnaeus, 1758	Animalia	Chordata	Osteichthyes	Cypriniformes	Cyprinidae	Cyprininae	Cyprinus	species	ASIZB	1	Chunguang Zhang | Yahui Zhao | Xuejian Li	Yahui Zhao | Xuejian Li	47.9911	85.7714	427	WGS84	8	Habahe	China	Xinjiang Uygur Autonomous Region	Altay Prefecture	Irtysh River
catalog:DQ:Fish:060	XJ-AL2016008	PreservedSpecimen	2016-07-17/18	Abbottina rivularis (Basilewsky, 1855)	Animalia	Chordata	Osteichthyes	Cypriniformes	Gobionidae		Abbottina	species	ASIZB	2	Chunguang Zhang | Yahui Zhao | Xuejian Li	Yahui Zhao | Xuejian Li	48.0106	85.5725	410	WGS84	8	Habahe	China	Xinjiang Uygur Autonomous Region	Altay Prefecture	Irtysh River
catalog:DQ:Fish:061	XJ-AL2016009	PreservedSpecimen	2016-07-17/18	Abramis brama (Linnaeus, 1758)	Animalia	Chordata	Osteichthyes	Cypriniformes	Leuciscidae	Leuciscinae	Abramis	species	ASIZB	4	Chunguang Zhang | Yahui Zhao | Xuejian Li	Yahui Zhao | Xuejian Li	48.0106	85.5725	410	WGS84	8	Habahe	China	Xinjiang Uygur Autonomous Region	Altay Prefecture	Irtysh River
catalog:DQ:Fish:062	XJ-AL2016010	PreservedSpecimen	2016-07-17/18	Pseudorasbora parva (Temminck & Schlegel, 1846)	Animalia	Chordata	Osteichthyes	Cypriniformes	Gobionidae		Pseudorasbora	species	ASIZB	1	Chunguang Zhang | Yahui Zhao | Xuejian Li	Yahui Zhao | Xuejian Li	48.0106	85.5725	410	WGS84	8	Habahe	China	Xinjiang Uygur Autonomous Region	Altay Prefecture	Irtysh River
catalog:DQ:Fish:063	XJ-AL2016011	PreservedSpecimen	2016-07-18	Abbottina rivularis (Basilewsky, 1855)	Animalia	Chordata	Osteichthyes	Cypriniformes	Gobionidae		Abbottina	species	ASIZB	57	Chunguang Zhang | Yahui Zhao | Xuejian Li	Yahui Zhao | Xuejian Li	48.0083	85.7042	423	WGS84	8	Habahe	China	Xinjiang Uygur Autonomous Region	Altay Prefecture	Bieliezeke River
catalog:DQ:Fish:064	XJ-AL2016012	PreservedSpecimen	2016-07-18	Pseudorasbora parva (Temminck & Schlegel, 1846)	Animalia	Chordata	Osteichthyes	Cypriniformes	Gobionidae		Pseudorasbora	species	ASIZB	1	Chunguang Zhang | Yahui Zhao | Xuejian Li	Yahui Zhao | Xuejian Li	48.0083	85.7042	423	WGS84	8	Habahe	China	Xinjiang Uygur Autonomous Region	Altay Prefecture	Bieliezeke River
catalog:DQ:Fish:065	XJ-AL2016013	PreservedSpecimen	2016-07-18/19	Pseudorasbora parva (Temminck & Schlegel, 1846)	Animalia	Chordata	Osteichthyes	Cypriniformes	Gobionidae		Pseudorasbora	species	ASIZB	1	Chunguang Zhang | Yahui Zhao | Xuejian Li	Yahui Zhao | Xuejian Li	48.1128	87.1133	667	WGS84	8	Burqin	China	Xinjiang Uygur Autonomous Region	Altay Prefecture	Buerjin River
catalog:DQ:Fish:066	XJ-AL2016014	PreservedSpecimen	2016-07-18/19	Hedinichthys minuta (Li, 1966)	Animalia	Chordata	Osteichthyes	Cypriniformes	Nemacheilidae		Hedinichthys	species	ASIZB	36	Chunguang Zhang | Yahui Zhao | Xuejian Li	Yahui Zhao | Xuejian Li	48.1128	87.1133	667	WGS84	8	Burqin	China	Xinjiang Uygur Autonomous Region	Altay Prefecture	Buerjin River
catalog:DQ:Fish:067	XJ-AL2016015	PreservedSpecimen	2016-07-19	Misgurnus anguillicaudatus (Cantor, 1842)	Animalia	Chordata	Osteichthyes	Cypriniformes	Cobitidae		Misgurnus	species	ASIZB	2	Chunguang Zhang | Yahui Zhao | Xuejian Li	Yahui Zhao | Xuejian Li	47.5433	87.9039	582	WGS84	8	Altay	China	Xinjiang Uygur Autonomous Region	Altay Prefecture	Kelan River
catalog:DQ:Fish:068	XJ-AL2016016	PreservedSpecimen	2016-07-19	Micropercops swinhonis (Günther, 1873)	Animalia	Chordata	Osteichthyes	Gobiiformes	Odontobutidae		Micropercops	species	ASIZB	1	Chunguang Zhang | Yahui Zhao | Xuejian Li	Yahui Zhao | Xuejian Li	47.5433	87.9039	582	WGS84	8	Altay	China	Xinjiang Uygur Autonomous Region	Altay Prefecture	Kelan River
catalog:DQ:Fish:069	XJ-AL2016017	PreservedSpecimen	2016-07-20	Abbottina rivularis (Basilewsky, 1855)	Animalia	Chordata	Osteichthyes	Cypriniformes	Gobionidae		Abbottina	species	ASIZB	8	Chunguang Zhang | Yahui Zhao | Xuejian Li	Yahui Zhao | Xuejian Li	47.0119	87.6697	513	WGS84	8	Fuhai	China	Xinjiang Uygur Autonomous Region	Altay Prefecture	Ulungur River
catalog:DQ:Fish:070	XJ-AL2016018	PreservedSpecimen	2016-07-20	Cyprinus carpio Linnaeus, 1758	Animalia	Chordata	Osteichthyes	Cypriniformes	Cyprinidae	Cyprininae	Cyprinus	species	ASIZB	1	Chunguang Zhang | Yahui Zhao | Xuejian Li	Yahui Zhao | Xuejian Li	46.6844	87.7464	540	WGS84	8	Fuhai	China	Xinjiang Uygur Autonomous Region	Altay Prefecture	Ulungur River
catalog:DQ:Fish:071	XJ-AL2016019	PreservedSpecimen	2016-07-20	Pseudorasbora parva (Temminck & Schlegel, 1846)	Animalia	Chordata	Osteichthyes	Cypriniformes	Gobionidae		Pseudorasbora	species	ASIZB	55	Chunguang Zhang | Yahui Zhao | Xuejian Li	Yahui Zhao | Xuejian Li	47.0119	87.6697	513	WGS84	8	Fuhai	China	Xinjiang Uygur Autonomous Region	Altay Prefecture	Ulungur River
catalog:DQ:Fish:072	XJ-AL2016020	PreservedSpecimen	2016-07-20	Pseudorasbora parva (Temminck & Schlegel, 1846)	Animalia	Chordata	Osteichthyes	Cypriniformes	Gobionidae		Pseudorasbora	species	ASIZB	5	Chunguang Zhang | Yahui Zhao | Xuejian Li	Yahui Zhao | Xuejian Li	46.8869	87.6869	538	WGS84	8	Fuhai	China	Xinjiang Uygur Autonomous Region	Altay Prefecture	Ulungur River
catalog:DQ:Fish:073	XJ-AL2016021	PreservedSpecimen	2016-07-20	Pseudorasbora parva (Temminck & Schlegel, 1846)	Animalia	Chordata	Osteichthyes	Cypriniformes	Gobionidae		Pseudorasbora	species	ASIZB	83	Chunguang Zhang | Yahui Zhao | Xuejian Li	Yahui Zhao | Xuejian Li	46.6844	87.7464	540	WGS84	8	Fuhai	China	Xinjiang Uygur Autonomous Region	Altay Prefecture	Ulungur River
catalog:DQ:Fish:074	XJ-AL2016022	PreservedSpecimen	2016-07-20	Sander lucioperca (Linnaeus, 1758)	Animalia	Chordata	Osteichthyes	Perciformes	Percidae	Luciopercinae	Sander	species	ASIZB	11	Chunguang Zhang | Yahui Zhao | Xuejian Li	Yahui Zhao | Xuejian Li	47.0119	87.6697	513	WGS84	8	Fuhai	China	Xinjiang Uygur Autonomous Region	Altay Prefecture	Ulungur River
catalog:DQ:Fish:075	XJ-AL2016023	PreservedSpecimen	2016-07-20	Triplophysa strauchii (Kessler, 1874)	Animalia	Chordata	Osteichthyes	Cypriniformes	Nemacheilidae		Triplophysa	species	ASIZB	3	Chunguang Zhang | Haolin Li | Xuejian Li	Yahui Zhao | Xuejian Li	47.0119	87.6697	513	WGS84	8	Fuhai	China	Xinjiang Uygur Autonomous Region	Altay Prefecture	Ulungur River
catalog:DQ:Fish:076	XJ-AL2016024	PreservedSpecimen	2016-07-20	Triplophysa strauchii (Kessler, 1874)	Animalia	Chordata	Osteichthyes	Cypriniformes	Nemacheilidae		Triplophysa	species	ASIZB	2	Chunguang Zhang | Haolin Li | Xuejian Li	Yahui Zhao | Xuejian Li	46.8869	87.6869	538	WGS84	8	Fuhai	China	Xinjiang Uygur Autonomous Region	Altay Prefecture	Ulungur River
catalog:DQ:Fish:077	XJ-AL2016025	PreservedSpecimen	2016-07-20	Hedinichthys minuta (Li, 1966)	Animalia	Chordata	Osteichthyes	Cypriniformes	Nemacheilidae		Hedinichthys	species	ASIZB	33	Chunguang Zhang | Yahui Zhao | Xuejian Li	Yahui Zhao | Xuejian Li	47.0119	87.6697	513	WGS84	8	Fuhai	China	Xinjiang Uygur Autonomous Region	Altay Prefecture	Ulungur River
catalog:DQ:Fish:078	XJ-AL2016026	PreservedSpecimen	2016-07-20	Hedinichthys minuta (Li, 1966)	Animalia	Chordata	Osteichthyes	Cypriniformes	Nemacheilidae		Hedinichthys	species	ASIZB	7	Chunguang Zhang | Yahui Zhao | Xuejian Li	Yahui Zhao | Xuejian Li	46.8869	87.6869	538	WGS84	8	Fuhai	China	Xinjiang Uygur Autonomous Region	Altay Prefecture	Ulungur River
catalog:DQ:Fish:079	XJ-AL2016027	PreservedSpecimen	2016-07-20	Sander lucioperca (Linnaeus, 1758)	Animalia	Chordata	Osteichthyes	Perciformes	Percidae	Luciopercinae	Sander	species	ASIZB	27	Chunguang Zhang | Yahui Zhao | Xuejian Li	Yahui Zhao | Xuejian Li	46.6844	87.7464	540	WGS84	8	Fuhai	China	Xinjiang Uygur Autonomous Region	Altay Prefecture	Ulungur River
catalog:DQ:Fish:080	XJ-AL2016028	PreservedSpecimen	2016-07-20/21	Abbottina rivularis (Basilewsky, 1855)	Animalia	Chordata	Osteichthyes	Cypriniformes	Gobionidae		Abbottina	species	ASIZB	1	Chunguang Zhang | Yahui Zhao | Xuejian Li	Yahui Zhao | Xuejian Li	46.5131	88.55	649	WGS84	8	Fuyun	China	Xinjiang Uygur Autonomous Region	Altay Prefecture	Ulungur River
catalog:DQ:Fish:081	XJ-AL2016029	PreservedSpecimen	2016-07-20/21	Pseudorasbora parva (Temminck & Schlegel, 1846)	Animalia	Chordata	Osteichthyes	Cypriniformes	Gobionidae		Pseudorasbora	species	ASIZB	136	Chunguang Zhang | Yahui Zhao | Xuejian Li	Yahui Zhao | Xuejian Li	46.5131	88.55	649	WGS84	8	Fuyun	China	Xinjiang Uygur Autonomous Region	Altay Prefecture	Ulungur River
catalog:DQ:Fish:082	XJ-AL2016030	PreservedSpecimen	2016-07-21	Pseudorasbora parva (Temminck & Schlegel, 1846)	Animalia	Chordata	Osteichthyes	Cypriniformes	Gobionidae		Pseudorasbora	species	ASIZB	1	Chunguang Zhang | Yahui Zhao | Xuejian Li	Yahui Zhao | Xuejian Li	47.2153	89.7828	1166	WGS84	8	Fuyun	China	Xinjiang Uygur Autonomous Region	Altay Prefecture	Kuyierte River
catalog:DQ:Fish:083	XJ-AL2016031	PreservedSpecimen	2016-07-21	Hedinichthys minuta (Li, 1966)	Animalia	Chordata	Osteichthyes	Cypriniformes	Nemacheilidae		Hedinichthys	species	ASIZB	14	Chunguang Zhang | Yahui Zhao | Xuejian Li	Yahui Zhao | Xuejian Li	47.2153	89.7828	1166	WGS84	8	Fuyun	China	Xinjiang Uygur Autonomous Region	Altay Prefecture	Irtysh River
catalog:DQ:Fish:084	XJ-AL2016032	PreservedSpecimen	2016-07-22	Triplophysa strauchii (Kessler, 1874)	Animalia	Chordata	Osteichthyes	Cypriniformes	Nemacheilidae		Triplophysa	species	ASIZB	2	Chunguang Zhang | Haolin Li | Xuejian Li	Yahui Zhao | Xuejian Li	46.1689	90.83	1110	WGS84	8	Qinggil	China	Xinjiang Uygur Autonomous Region	Altay Prefecture	Burgen River
catalog:DQ:Fish:085	XJ-AL2016033	PreservedSpecimen	2016-07-22	Cyprinus carpio Linnaeus, 1758	Animalia	Chordata	Osteichthyes	Cypriniformes	Cyprinidae	Cyprininae	Cyprinus	species	ASIZB	32	Chunguang Zhang | Yahui Zhao | Xuejian Li	Yahui Zhao | Xuejian Li	46.1689	90.83	1110	WGS84	8	Qinggil	China	Xinjiang Uygur Autonomous Region	Altay Prefecture	Burgen River
catalog:DQ:Fish:086	XJ-AL2016034	PreservedSpecimen	2016-07-22	Pseudorasbora parva (Temminck & Schlegel, 1846)	Animalia	Chordata	Osteichthyes	Cypriniformes	Gobionidae		Pseudorasbora	species	ASIZB	10	Chunguang Zhang | Yahui Zhao | Xuejian Li	Yahui Zhao | Xuejian Li	46.1689	90.83	1110	WGS84	8	Qinggil	China	Xinjiang Uygur Autonomous Region	Altay Prefecture	Burgen River
catalog:DQ:Fish:087	XJ-AL2016035	PreservedSpecimen	2016-07-22/23	Pseudorasbora parva (Temminck & Schlegel, 1846)	Animalia	Chordata	Osteichthyes	Cypriniformes	Gobionidae		Pseudorasbora	species	ASIZB	14	Chunguang Zhang | Yahui Zhao | Xuejian Li	Yahui Zhao | Xuejian Li	46.4761	90.2233	1138	WGS84	8	Qinggil	China	Xinjiang Uygur Autonomous Region	Altay Prefecture	Ulungur River
catalog:DQ:Fish:088	XJ-AL2016036	PreservedSpecimen	2016-07-23	Cyprinus carpio Linnaeus, 1758	Animalia	Chordata	Osteichthyes	Cypriniformes	Cyprinidae	Cyprininae	Cyprinus	species	ASIZB	1	Chunguang Zhang | Yahui Zhao | Xuejian Li	Yahui Zhao | Xuejian Li	46.0525	90.1372	910	WGS84	8	Qinggil	China	Xinjiang Uygur Autonomous Region	Altay Prefecture	Ulungur River
catalog:DQ:Fish:089	XJ-AL2016037	PreservedSpecimen	2016-07-23	Pseudorasbora parva (Temminck & Schlegel, 1846)	Animalia	Chordata	Osteichthyes	Cypriniformes	Gobionidae		Pseudorasbora	species	ASIZB	42	Chunguang Zhang | Yahui Zhao | Xuejian Li	Yahui Zhao | Xuejian Li	46.0525	90.1372	910	WGS84	8	Qinggil	China	Xinjiang Uygur Autonomous Region	Altay Prefecture	Ulungur River
catalog:DQ:Fish:090	XJ-AL2016038	PreservedSpecimen	2016-07-23/24	Abbottina rivularis (Basilewsky, 1855)	Animalia	Chordata	Osteichthyes	Cypriniformes	Gobionidae		Abbottina	species	ASIZB	1	Chunguang Zhang | Yahui Zhao | Xuejian Li	Yahui Zhao | Xuejian Li	46.3369	89.5406	819	WGS84	8	Fuyun	China	Xinjiang Uygur Autonomous Region	Altay Prefecture	Ulungur River
catalog:DQ:Fish:091	XJ-AL2016039	PreservedSpecimen	2016-07-23/24	Pseudorasbora parva (Temminck & Schlegel, 1846)	Animalia	Chordata	Osteichthyes	Cypriniformes	Gobionidae		Pseudorasbora	species	ASIZB	62	Chunguang Zhang | Yahui Zhao | Xuejian Li	Yahui Zhao | Xuejian Li	46.3369	89.5406	819	WGS84	8	Fuyun	China	Xinjiang Uygur Autonomous Region	Altay Prefecture	Ulungur River
catalog:DQ:Fish:092	XJ-AL2022001	PreservedSpecimen	2022-07-02	Cyprinus carpio Linnaeus, 1758	Animalia	Chordata	Osteichthyes	Cypriniformes	Cyprinidae	Cyprininae	Cyprinus	species	ASIZB	1	Dong Sheng | Ming Zou | Xinxin Li	Yahui Zhao | Dong Sheng | Qiuju Chen | Chen Tian | Xin Wang	47.01355284	87.67357029	508	WGS84	1	Fuhai	China	Xinjiang Uygur Autonomous Region	Altay Prefecture	Ulungur River
catalog:DQ:Fish:093	XJ-AL2022002	PreservedSpecimen	2022-07-02	Cyprinus carpio Linnaeus, 1758	Animalia	Chordata	Osteichthyes	Cypriniformes	Cyprinidae	Cyprininae	Cyprinus	species	ASIZB	14	Dong Sheng | Ming Zou | Xinxin Li	Yahui Zhao | Dong Sheng | Qiuju Chen | Chen Tian | Xin Wang	46.88600599	87.69184918	534	WGS84	1	Fuhai	China	Xinjiang Uygur Autonomous Region	Altay Prefecture	Ulungur River
catalog:DQ:Fish:094	XJ-AL2022003	PreservedSpecimen	2022-07-02	Pseudorasbora parva (Temminck & Schlegel, 1846)	Animalia	Chordata	Osteichthyes	Cypriniformes	Gobionidae		Pseudorasbora	species	ASIZB	10	Dong Sheng | Ming Zou | Xinxin Li	Yahui Zhao | Dong Sheng | Qiuju Chen | Chen Tian | Xin Wang	47.01355284	87.67357029	508	WGS84	1	Fuhai	China	Xinjiang Uygur Autonomous Region	Altay Prefecture	Ulungur River
catalog:DQ:Fish:095	XJ-AL2022004	PreservedSpecimen	2022-07-02	Pseudorasbora parva (Temminck & Schlegel, 1846)	Animalia	Chordata	Osteichthyes	Cypriniformes	Gobionidae		Pseudorasbora	species	ASIZB	90	Dong Sheng | Ming Zou | Xinxin Li	Yahui Zhao | Dong Sheng | Qiuju Chen | Chen Tian | Xin Wang	46.88600599	87.69184918	534	WGS84	1	Fuhai	China	Xinjiang Uygur Autonomous Region	Altay Prefecture	Ulungur River
catalog:DQ:Fish:096	XJ-AL2022005	PreservedSpecimen	2022-07-02	Abbottina rivularis (Basilewsky, 1855)	Animalia	Chordata	Osteichthyes	Cypriniformes	Gobionidae		Abbottina	species	ASIZB	2	Dong Sheng | Ming Zou | Xinxin Li	Yahui Zhao | Dong Sheng | Qiuju Chen | Chen Tian | Xin Wang	46.88600599	87.69184918	534	WGS84	1	Fuhai	China	Xinjiang Uygur Autonomous Region	Altay Prefecture	Ulungur River
catalog:DQ:Fish:097	XJ-AL2022006	PreservedSpecimen	2022-07-02	Misgurnus anguillicaudatus (Cantor, 1842)	Animalia	Chordata	Osteichthyes	Cypriniformes	Cobitidae		Misgurnus	species	ASIZB	6	Dong Sheng | Ming Zou | Xinxin Li	Yahui Zhao | Dong Sheng | Qiuju Chen | Chen Tian | Xin Wang	46.88600599	87.69184918	534	WGS84	1	Fuhai	China	Xinjiang Uygur Autonomous Region	Altay Prefecture	Ulungur River
catalog:DQ:Fish:098	XJ-AL2022007	PreservedSpecimen	2022-07-02	Hypomesus olidus (Pallas, 1814)	Animalia	Chordata	Osteichthyes	Osmeriformes	Osmeridae		Hypomesus	species	ASIZB	2	Dong Sheng | Ming Zou | Xinxin Li	Yahui Zhao | Dong Sheng | Qiuju Chen | Chen Tian | Xin Wang	46.88600599	87.69184918	534	WGS84	1	Fuhai	China	Xinjiang Uygur Autonomous Region	Altay Prefecture	Ulungur River
catalog:DQ:Fish:099	XJ-AL2022008	PreservedSpecimen	2022-07-02	Carassius auratus (Linnaeus, 1758)	Animalia	Chordata	Osteichthyes	Cypriniformes	Cyprinidae	Cyprininae	Carassius	species	ASIZB	2	Dong Sheng | Ming Zou | Xinxin Li	Yahui Zhao | Dong Sheng | Qiuju Chen | Chen Tian | Xin Wang	47.01355284	87.67357029	508	WGS84	1	Fuhai	China	Xinjiang Uygur Autonomous Region	Altay Prefecture	Ulungur River
catalog:DQ:Fish:100	XJ-AL2022009	PreservedSpecimen	2022-07-02	Carassius auratus (Linnaeus, 1758)	Animalia	Chordata	Osteichthyes	Cypriniformes	Cyprinidae	Cyprininae	Carassius	species	ASIZB	5	Dong Sheng | Ming Zou | Xinxin Li	Yahui Zhao | Dong Sheng | Qiuju Chen | Chen Tian | Xin Wang	46.88600599	87.69184918	534	WGS84	1	Fuhai	China	Xinjiang Uygur Autonomous Region	Altay Prefecture	Ulungur River
catalog:DQ:Fish:101	XJ-AL2022010	PreservedSpecimen	2022-07-03	Carassius auratus (Linnaeus, 1758)	Animalia	Chordata	Osteichthyes	Cypriniformes	Cyprinidae	Cyprininae	Carassius	species	ASIZB	1	Yahui Zhao | Jue Bai | Yu Wang | Chen Tian	Yahui Zhao | Dong Sheng | Qiuju Chen | Chen Tian | Xin Wang	47.49061649	87.33746355	477	WGS84	1	Altay	China	Xinjiang Uygur Autonomous Region	Altay Prefecture	Irtysh River
catalog:DQ:Fish:102	XJ-AL2022011	PreservedSpecimen	2022-07-03	Cyprinus carpio Linnaeus, 1758	Animalia	Chordata	Osteichthyes	Cypriniformes	Cyprinidae	Cyprininae	Cyprinus	species	ASIZB	543	Yahui Zhao | Jue Bai | Yu Wang | Chen Tian	Yahui Zhao | Dong Sheng | Qiuju Chen | Chen Tian | Xin Wang	47.37106703	87.81265092	496	WGS84	1	Beitun	China	Xinjiang Uygur Autonomous Region	Altay Prefecture	Irtysh River
catalog:DQ:Fish:103	XJ-AL2022012	PreservedSpecimen	2022-07-03	Abramis brama (Linnaeus, 1758)	Animalia	Chordata	Osteichthyes	Cypriniformes	Leuciscidae	Leuciscinae	Abramis	species	ASIZB	54	Dong Sheng | Ming Zou | Xinxin Li	Yahui Zhao | Dong Sheng | Qiuju Chen | Chen Tian | Xin Wang	47.3064802	87.34204373	469	WGS84	1	Fuhai	China	Xinjiang Uygur Autonomous Region	Altay Prefecture	Ulungur Lake
catalog:DQ:Fish:104	XJ-AL2022013	PreservedSpecimen	2022-07-03	Abramis brama (Linnaeus, 1758)	Animalia	Chordata	Osteichthyes	Cypriniformes	Leuciscidae	Leuciscinae	Abramis	species	ASIZB	1	Yahui Zhao | Jue Bai | Yu Wang | Chen Tian	Yahui Zhao | Dong Sheng | Qiuju Chen | Chen Tian | Xin Wang	47.37106703	87.81265092	496	WGS84	1	Beitun	China	Xinjiang Uygur Autonomous Region	Altay Prefecture	Irtysh River
catalog:DQ:Fish:105	XJ-AL2022014	PreservedSpecimen	2022-07-03	Pseudorasbora parva (Temminck & Schlegel, 1846)	Animalia	Chordata	Osteichthyes	Cypriniformes	Gobionidae		Pseudorasbora	species	ASIZB	3	Yahui Zhao | Jue Bai | Yu Wang | Chen Tian	Yahui Zhao | Dong Sheng | Qiuju Chen | Chen Tian | Xin Wang	47.54589321	87.90023398	512	WGS84	1	Altay	China	Xinjiang Uygur Autonomous Region	Altay Prefecture	Kelan River
catalog:DQ:Fish:106	XJ-AL2022015	PreservedSpecimen	2022-07-03	Pseudorasbora parva (Temminck & Schlegel, 1846)	Animalia	Chordata	Osteichthyes	Cypriniformes	Gobionidae		Pseudorasbora	species	ASIZB	5	Yahui Zhao | Jue Bai | Yu Wang | Chen Tian	Yahui Zhao | Dong Sheng | Qiuju Chen | Chen Tian | Xin Wang	47.37106703	87.81265092	496	WGS84	1	Beitun	China	Xinjiang Uygur Autonomous Region	Altay Prefecture	Irtysh River
catalog:DQ:Fish:107	XJ-AL2022016	PreservedSpecimen	2022-07-03	Micropercops swinhonis (Günther, 1873)	Animalia	Chordata	Osteichthyes	Gobiiformes	Odontobutidae		Micropercops	species	ASIZB	4	Yahui Zhao | Jue Bai | Yu Wang | Chen Tian	Yahui Zhao | Dong Sheng | Qiuju Chen | Chen Tian | Xin Wang	47.54589321	87.90023399	512	WGS84	1	Altay	China	Xinjiang Uygur Autonomous Region	Altay Prefecture	Kelan River
catalog:DQ:Fish:108	XJ-AL2022017	PreservedSpecimen	2022-07-03	Sander lucioperca (Linnaeus, 1758)	Animalia	Chordata	Osteichthyes	Perciformes	Percidae	Luciopercinae	Sander	species	ASIZB	2	Dong Sheng | Ming Zou | Xinxin Li	Yahui Zhao | Dong Sheng | Qiuju Chen | Chen Tian | Xin Wang	47.3064802	87.3420437	469	WGS84	1	Fuhai	China	Xinjiang Uygur Autonomous Region	Altay Prefecture	Ulungur Lake
catalog:DQ:Fish:109	XJ-AL2022018	PreservedSpecimen	2022-07-03	Sander lucioperca (Linnaeus, 1758)	Animalia	Chordata	Osteichthyes	Perciformes	Percidae	Luciopercinae	Sander	species	ASIZB	7	Dong Sheng | Ming Zou | Xinxin Li	Yahui Zhao | Dong Sheng | Qiuju Chen | Chen Tian | Xin Wang	47.92558916	87.38412402	466	WGS84	1	Fuhai	China	Xinjiang Uygur Autonomous Region	Altay Prefecture	Ulungur Lake
catalog:DQ:Fish:110	XJ-AL2022019	PreservedSpecimen	2022-07-03	Hypomesus olidus (Pallas, 1814)	Animalia	Chordata	Osteichthyes	Osmeriformes	Osmeridae		Hypomesus	species	ASIZB	3	Dong Sheng | Ming Zou | Xinxin Li	Yahui Zhao | Dong Sheng | Qiuju Chen | Chen Tian | Xin Wang	47.3064802	87.3420437	469	WGS84	1	Fuhai	China	Xinjiang Uygur Autonomous Region	Altay Prefecture	Ulungur Lake
catalog:DQ:Fish:111	XJ-AL2022020	PreservedSpecimen	2022-07-03	Hypomesus olidus (Pallas, 1814)	Animalia	Chordata	Osteichthyes	Osmeriformes	Osmeridae		Hypomesus	species	ASIZB	39	Dong Sheng | Ming Zou | Xinxin Li	Yahui Zhao | Dong Sheng | Qiuju Chen | Chen Tian | Xin Wang	47.92558916	87.38412402	466	WGS84	1	Fuhai	China	Xinjiang Uygur Autonomous Region	Altay Prefecture	Ulungur Lake
catalog:DQ:Fish:112	XJ-AL2022021	PreservedSpecimen	2022-07-03	Cyprinus carpio Linnaeus, 1758	Animalia	Chordata	Osteichthyes	Cypriniformes	Cyprinidae	Cyprininae	Cyprinus	species	ASIZB	2	Yahui Zhao | Jue Bai | Yu Wang | Chen Tian	Yahui Zhao | Dong Sheng | Qiuju Chen | Chen Tian | Xin Wang	47.49061649	87.33746355	477	WGS84	1	Altay	China	Xinjiang Uygur Autonomous Region	Altay Prefecture	Irtysh River
catalog:DQ:Fish:113	XJ-AL2022022	PreservedSpecimen	2022-07-04	Cyprinus carpio Linnaeus, 1758	Animalia	Chordata	Osteichthyes	Cypriniformes	Cyprinidae	Cyprininae	Cyprinus	species	ASIZB	15	Dong Sheng | Ming Zou | Xinxin Li	Yahui Zhao | Dong Sheng | Qiuju Chen | Chen Tian | Xin Wang	46.55079125	88.46288257	659	WGS84	1	Fuyun	China	Xinjiang Uygur Autonomous Region	Altay Prefecture	Ulungur River
catalog:DQ:Fish:114	XJ-AL2022023	PreservedSpecimen	2022-07-04	Cyprinus carpio Linnaeus, 1758	Animalia	Chordata	Osteichthyes	Cypriniformes	Cyprinidae	Cyprininae	Cyprinus	species	ASIZB	13	Yahui Zhao | Jue Bai | Yu Wang | Chen Tian	Yahui Zhao | Dong Sheng | Qiuju Chen | Chen Tian | Xin Wang	47.69033737	86.87612346	468	WGS84	1	Burqin	China	Xinjiang Uygur Autonomous Region	Altay Prefecture	Irtysh River
catalog:DQ:Fish:115	XJ-AL2022024	PreservedSpecimen	2022-07-04	Abramis brama (Linnaeus, 1758)	Animalia	Chordata	Osteichthyes	Cypriniformes	Leuciscidae	Leuciscinae	Abramis	species	ASIZB	4	Yahui Zhao | Jue Bai | Yu Wang | Chen Tian	Yahui Zhao | Dong Sheng | Qiuju Chen | Chen Tian | Xin Wang	47.49061649	87.33746355	477	WGS84	1	Altay	China	Xinjiang Uygur Autonomous Region	Altay Prefecture	Irtysh River
catalog:DQ:Fish:116	XJ-AL2022025	PreservedSpecimen	2022-07-04	Pseudorasbora parva (Temminck & Schlegel, 1846)	Animalia	Chordata	Osteichthyes	Cypriniformes	Gobionidae		Pseudorasbora	species	ASIZB	6	Dong Sheng | Ming Zou | Xinxin Li	Yahui Zhao | Dong Sheng | Qiuju Chen | Chen Tian | Xin Wang	46.55079125	88.46288257	659	WGS84	1	Fuyun	China	Xinjiang Uygur Autonomous Region	Altay Prefecture	Ulungur River
catalog:DQ:Fish:117	XJ-AL2022026	PreservedSpecimen	2022-07-04	Pseudorasbora parva (Temminck & Schlegel, 1846)	Animalia	Chordata	Osteichthyes	Cypriniformes	Gobionidae		Pseudorasbora	species	ASIZB	1	Yahui Zhao | Jue Bai | Yu Wang | Chen Tian	Yahui Zhao | Dong Sheng | Qiuju Chen | Chen Tian | Xin Wang	47.49061649	87.33746355	477	WGS84	1	Altay	China	Xinjiang Uygur Autonomous Region	Altay Prefecture	Irtysh River
catalog:DQ:Fish:118	XJ-AL2022027	PreservedSpecimen	2022-07-04	Misgurnus anguillicaudatus (Cantor, 1842)	Animalia	Chordata	Osteichthyes	Cypriniformes	Cobitidae		Misgurnus	species	ASIZB	1	Yahui Zhao | Jue Bai | Yu Wang | Chen Tian	Yahui Zhao | Dong Sheng | Qiuju Chen | Chen Tian | Xin Wang	47.49061649	87.33746355	477	WGS84	1	Altay	China	Xinjiang Uygur Autonomous Region	Altay Prefecture	Irtysh River
catalog:DQ:Fish:119	XJ-AL2022028	PreservedSpecimen	2022-07-04	Carassius auratus (Linnaeus, 1758)	Animalia	Chordata	Osteichthyes	Cypriniformes	Cyprinidae	Cyprininae	Carassius	species	ASIZB	2	Yahui Zhao | Jue Bai | Yu Wang | Chen Tian	Yahui Zhao | Dong Sheng | Qiuju Chen | Chen Tian | Xin Wang	47.69033737	86.87612346	468	WGS84	1	Burqin	China	Xinjiang Uygur Autonomous Region	Altay Prefecture	Irtysh River
catalog:DQ:Fish:120	XJ-AL2022029	PreservedSpecimen	2022-07-05	Carassius auratus (Linnaeus, 1758)	Animalia	Chordata	Osteichthyes	Cypriniformes	Cyprinidae	Cyprininae	Carassius	species	ASIZB	5	Dong Sheng | Ming Zou | Xinxin Li	Yahui Zhao | Dong Sheng | Qiuju Chen | Chen Tian | Xin Wang	46.40517942	88.68710839	687	WGS84	1	Fuyun	China	Xinjiang Uygur Autonomous Region	Altay Prefecture	Ulungur River
catalog:DQ:Fish:121	XJ-AL2022030	PreservedSpecimen	2022-07-05	Cyprinus carpio Linnaeus, 1758	Animalia	Chordata	Osteichthyes	Cypriniformes	Cyprinidae	Cyprininae	Cyprinus	species	ASIZB	35	Dong Sheng | Ming Zou | Xinxin Li	Yahui Zhao | Dong Sheng | Qiuju Chen | Chen Tian | Xin Wang	46.40517942	88.68710839	687	WGS84	1	Fuyun	China	Xinjiang Uygur Autonomous Region	Altay Prefecture	Ulungur River
catalog:DQ:Fish:122	XJ-AL2022031	PreservedSpecimen	2022-07-05	Pseudorasbora parva (Temminck & Schlegel, 1846)	Animalia	Chordata	Osteichthyes	Cypriniformes	Gobionidae		Pseudorasbora	species	ASIZB	92	Dong Sheng | Ming Zou | Xinxin Li	Yahui Zhao | Dong Sheng | Qiuju Chen | Chen Tian | Xin Wang	46.40517942	88.68710839	687	WGS84	1	Fuyun	China	Xinjiang Uygur Autonomous Region	Altay Prefecture	Ulungur River
catalog:DQ:Fish:123	XJ-AL2022032	PreservedSpecimen	2022-07-05	Abbottina rivularis (Basilewsky, 1855)	Animalia	Chordata	Osteichthyes	Cypriniformes	Gobionidae		Abbottina	species	ASIZB	3	Dong Sheng | Ming Zou | Xinxin Li	Yahui Zhao | Dong Sheng | Qiuju Chen | Chen Tian | Xin Wang	46.40517942	88.68710839	687	WGS84	1	Fuyun	China	Xinjiang Uygur Autonomous Region	Altay Prefecture	Ulungur River
catalog:DQ:Fish:124	XJ-AL2022033	PreservedSpecimen	2022-07-05	Misgurnus anguillicaudatus (Cantor, 1842)	Animalia	Chordata	Osteichthyes	Cypriniformes	Cobitidae	Cyprinus carpio Linnaeus, 1758+F122:S122	Misgurnus	species	ASIZB	16	Dong Sheng | Ming Zou | Xinxin Li	Yahui Zhao | Dong Sheng | Qiuju Chen | Chen Tian | Xin Wang	46.40517942	88.68710839	687	WGS84	1	Fuyun	China	Xinjiang Uygur Autonomous Region	Altay Prefecture	Ulungur River
catalog:DQ:Fish:125	XJ-AL2022034	PreservedSpecimen	2022-07-06	Carassius auratus (Linnaeus, 1758)	Animalia	Chordata	Osteichthyes	Cypriniformes	Cyprinidae	Cyprininae	Carassius	species	ASIZB	6	Dong Sheng | Ming Zou | Xinxin Li	Yahui Zhao | Dong Sheng | Qiuju Chen | Chen Tian | Xin Wang	46.33751786	89.54376179	806	WGS84	1	Fuyun	China	Xinjiang Uygur Autonomous Region	Altay Prefecture	Ulungur River
catalog:DQ:Fish:126	XJ-AL2022035	PreservedSpecimen	2022-07-06	Cyprinus carpio Linnaeus, 1758	Animalia	Chordata	Osteichthyes	Cypriniformes	Cyprinidae	Cyprininae	Cyprinus	species	ASIZB	1	Dong Sheng | Ming Zou | Xinxin Li	Yahui Zhao | Dong Sheng | Qiuju Chen | Chen Tian | Xin Wang	46.48147226	89.33430791	789	WGS84	1	Fuyun	China	Xinjiang Uygur Autonomous Region	Altay Prefecture	Ulungur River
catalog:DQ:Fish:127	XJ-AL2022036	PreservedSpecimen	2022-07-06	Cyprinus carpio Linnaeus, 1758	Animalia	Chordata	Osteichthyes	Cypriniformes	Cyprinidae	Cyprininae	Cyprinus	species	ASIZB	2	Dong Sheng | Ming Zou | Xinxin Li	Yahui Zhao | Dong Sheng | Qiuju Chen | Chen Tian | Xin Wang	46.33751786	89.54376179	806	WGS84	1	Fuyun	China	Xinjiang Uygur Autonomous Region	Altay Prefecture	Ulungur River
catalog:DQ:Fish:128	XJ-AL2022037	PreservedSpecimen	2022-07-06	Pseudorasbora parva (Temminck & Schlegel, 1846)	Animalia	Chordata	Osteichthyes	Cypriniformes	Gobionidae		Pseudorasbora	species	ASIZB	15	Dong Sheng | Ming Zou | Xinxin Li	Yahui Zhao | Dong Sheng | Qiuju Chen | Chen Tian | Xin Wang	46.48147226	89.33430791	789	WGS84	1	Fuyun	China	Xinjiang Uygur Autonomous Region	Altay Prefecture	Ulungur River
catalog:DQ:Fish:129	XJ-AL2022038	PreservedSpecimen	2022-07-06	Pseudorasbora parva (Temminck & Schlegel, 1846)	Animalia	Chordata	Osteichthyes	Cypriniformes	Gobionidae		Pseudorasbora	species	ASIZB	2	Dong Sheng | Ming Zou | Xinxin Li	Yahui Zhao | Dong Sheng | Qiuju Chen | Chen Tian | Xin Wang	46.42823487	89.42969811	808	WGS84	1	Fuyun	China	Xinjiang Uygur Autonomous Region	Altay Prefecture	Ulungur River
catalog:DQ:Fish:130	XJ-AL2022039	PreservedSpecimen	2022-07-06	Pseudorasbora parva (Temminck & Schlegel, 1846)	Animalia	Chordata	Osteichthyes	Cypriniformes	Gobionidae		Pseudorasbora	species	ASIZB	12	Dong Sheng | Ming Zou | Xinxin Li	Yahui Zhao | Dong Sheng | Qiuju Chen | Chen Tian | Xin Wang	46.33751786	89.54376179	806	WGS84	1	Fuyun	China	Xinjiang Uygur Autonomous Region	Altay Prefecture	Ulungur River
catalog:DQ:Fish:131	XJ-AL2022040	PreservedSpecimen	2022-07-06	Abbottina rivularis (Basilewsky, 1855)	Animalia	Chordata	Osteichthyes	Cypriniformes	Gobionidae		Abbottina	species	ASIZB	4	Dong Sheng | Ming Zou | Xinxin Li	Yahui Zhao | Dong Sheng | Qiuju Chen | Chen Tian | Xin Wang	46.48147226	89.33430791	789	WGS84	1	Fuyun	China	Xinjiang Uygur Autonomous Region	Altay Prefecture	Ulungur River
catalog:DQ:Fish:132	XJ-AL2022041	PreservedSpecimen	2022-07-06	Misgurnus anguillicaudatus (Cantor, 1842)	Animalia	Chordata	Osteichthyes	Cypriniformes	Cobitidae		Misgurnus	species	ASIZB	18	Dong Sheng | Ming Zou | Xinxin Li	Yahui Zhao | Dong Sheng | Qiuju Chen | Chen Tian | Xin Wang	46.48147226	89.33430791	789	WGS84	1	Fuyun	China	Xinjiang Uygur Autonomous Region	Altay Prefecture	Ulungur River
catalog:DQ:Fish:133	XJ-AL2022042	PreservedSpecimen	2022-07-06	Misgurnus anguillicaudatus (Cantor, 1842)	Animalia	Chordata	Osteichthyes	Cypriniformes	Cobitidae		Misgurnus	species	ASIZB	6	Yahui Zhao | Jue Bai | Yu Wang | Chen Tian	Yahui Zhao | Dong Sheng | Qiuju Chen | Chen Tian | Xin Wang	47.83594753	86.66149855	448	WGS84	1	Burqin	China	Xinjiang Uygur Autonomous Region	Altay Prefecture	Buerjin River
catalog:DQ:Fish:134	XJ-AL2022043	PreservedSpecimen	2022-07-06	Misgurnus dabryanus (Dabry de Thiersant, 1872)	Animalia	Chordata	Osteichthyes	Cypriniformes	Cobitidae		Misgurnus	species	ASIZB	8	Dong Sheng | Ming Zou | Xinxin Li	Yahui Zhao | Dong Sheng | Qiuju Chen | Chen Tian | Xin Wang	46.48147226	89.33430791	789	WGS84	1	Fuyun	China	Xinjiang Uygur Autonomous Region	Altay Prefecture	Ulungur River
catalog:DQ:Fish:135	XJ-AL2022044	PreservedSpecimen	2022-07-06	Misgurnus dabryanus (Dabry de Thiersant, 1872)	Animalia	Chordata	Osteichthyes	Cypriniformes	Cobitidae		Misgurnus	species	ASIZB	1	Dong Sheng | Ming Zou | Xinxin Li	Yahui Zhao | Dong Sheng | Qiuju Chen | Chen Tian | Xin Wang	46.33751786	89.54376179	806	WGS84	1	Fuyun	China	Xinjiang Uygur Autonomous Region	Altay Prefecture	Ulungur River
catalog:DQ:Fish:136	XJ-AL2022045	PreservedSpecimen	2022-07-06	Hedinichthys minuta (Li, 1966)	Animalia	Chordata	Osteichthyes	Cypriniformes	Nemacheilidae		Hedinichthys	species	ASIZB	1	Yahui Zhao | Jue Bai | Yu Wang | Chen Tian	Yahui Zhao | Dong Sheng | Qiuju Chen | Chen Tian | Xin Wang	48.2233627	87.23330948	754	WGS84	1	Burqin	China	Xinjiang Uygur Autonomous Region	Altay Prefecture	Buerjin River
catalog:DQ:Fish:137	XJ-AL2022046	PreservedSpecimen	2022-07-06	Carassius auratus (Linnaeus, 1758)	Animalia	Chordata	Osteichthyes	Cypriniformes	Cyprinidae	Cyprininae	Carassius	species	ASIZB	2	Yahui Zhao | Jue Bai | Yu Wang | Chen Tian	Yahui Zhao | Dong Sheng | Qiuju Chen | Chen Tian | Xin Wang	47.83594754	86.66149855	448	WGS84	1	Burqin	China	Xinjiang Uygur Autonomous Region	Altay Prefecture	Buerjin River
catalog:DQ:Fish:138	XJ-AL2022047	PreservedSpecimen	2022-07-08	Pseudorasbora parva (Temminck & Schlegel, 1846)	Animalia	Chordata	Osteichthyes	Cypriniformes	Gobionidae		Pseudorasbora	species	ASIZB	2	Dong Sheng | Ming Zou | Xinxin Li	Yahui Zhao | Dong Sheng | Qiuju Chen | Chen Tian | Xin Wang	46.2819301	90.40507398	1076	WGS84	1	Qinggil	China	Xinjiang Uygur Autonomous Region	Altay Prefecture	Ulungur River
catalog:DQ:Fish:139	XJ-AL2022048	PreservedSpecimen	2022-07-08	Sander lucioperca (Linnaeus, 1758)	Animalia	Chordata	Osteichthyes	Perciformes	Percidae	Luciopercinae	Sander	species	ASIZB	1	Dong Sheng | Ming Zou | Xinxin Li	Yahui Zhao | Dong Sheng | Qiuju Chen | Chen Tian | Xin Wang	46.17959093	90.81239541	1122	WGS84	1	Qinggil	China	Xinjiang Uygur Autonomous Region	Altay Prefecture	Burgen River
catalog:DQ:Fish:140	XJ-AL2022049	PreservedSpecimen	2022-07-09	Misgurnus anguillicaudatus (Cantor, 1842)	Animalia	Chordata	Osteichthyes	Cypriniformes	Cobitidae		Misgurnus	species	ASIZB	1	Yahui Zhao | Jue Bai | Yu Wang | Chen Tian	Yahui Zhao | Dong Sheng | Qiuju Chen | Chen Tian | Xin Wang	48.17782989	86.42283274	587	WGS84	1	Habahe	China	Xinjiang Uygur Autonomous Region	Altay Prefecture	Habahe River
catalog:DQ:Fish:141	XJ-AL2022050	PreservedSpecimen	2022-07-10	Cyprinus carpio Linnaeus, 1758	Animalia	Chordata	Osteichthyes	Cypriniformes	Cyprinidae	Cyprininae	Cyprinus	species	ASIZB	3	Yahui Zhao | Jue Bai | Yu Wang | Chen Tian	Yahui Zhao | Dong Sheng | Qiuju Chen | Chen Tian | Xin Wang	47.87260901	86.21119458	428	WGS84	1	Habahe	China	Xinjiang Uygur Autonomous Region	Altay Prefecture	Haba River
catalog:DQ:Fish:142	XJ-AL2022051	PreservedSpecimen	2022-07-10	Cyprinus carpio Linnaeus, 1758	Animalia	Chordata	Osteichthyes	Cypriniformes	Cyprinidae	Cyprininae	Cyprinus	species	ASIZB	3	Yahui Zhao | Jue Bai | Yu Wang | Chen Tian	Yahui Zhao | Dong Sheng | Qiuju Chen | Chen Tian | Xin Wang	47.87344259	86.27319304	430	WGS84	1	Habahe	China	Xinjiang Uygur Autonomous Region	Altay Prefecture	Irtysh River
catalog:DQ:Fish:143	XJ-AL2022052	PreservedSpecimen	2022-07-10	Abramis brama (Linnaeus, 1758)	Animalia	Chordata	Osteichthyes	Cypriniformes	Leuciscidae	Leuciscinae	Abramis	species	ASIZB	4	Yahui Zhao | Jue Bai | Yu Wang | Chen Tian	Yahui Zhao | Dong Sheng | Qiuju Chen | Chen Tian | Xin Wang	47.87260901	86.21119458	428	WGS84	1	Habahe	China	Xinjiang Uygur Autonomous Region	Altay Prefecture	Habahe River
catalog:DQ:Fish:144	XJ-AL2022053	PreservedSpecimen	2022-07-10	Abramis brama (Linnaeus, 1758)	Animalia	Chordata	Osteichthyes	Cypriniformes	Leuciscidae	Leuciscinae	Abramis	species	ASIZB	5	Yahui Zhao | Jue Bai | Yu Wang | Chen Tian	Yahui Zhao | Dong Sheng | Qiuju Chen | Chen Tian | Xin Wang	47.87344259	86.27319304	430	WGS84	1	Habahe	China	Xinjiang Uygur Autonomous Region	Altay Prefecture	Irtysh River
catalog:DQ:Fish:145	XJ-AL2022054	PreservedSpecimen	2022-07-10	Pseudorasbora parva (Temminck & Schlegel, 1846)	Animalia	Chordata	Osteichthyes	Cypriniformes	Gobionidae		Pseudorasbora	species	ASIZB	2	Yahui Zhao | Jue Bai | Yu Wang | Chen Tian	Yahui Zhao | Dong Sheng | Qiuju Chen | Chen Tian | Xin Wang	48.07048146	86.34622201	530	WGS84	1	Habahe	China	Xinjiang Uygur Autonomous Region	Altay Prefecture	Habahe River
catalog:DQ:Fish:146	XJ-AL2022055	PreservedSpecimen	2022-07-10	Misgurnus anguillicaudatus (Cantor, 1842)	Animalia	Chordata	Osteichthyes	Cypriniformes	Cobitidae		Misgurnus	species	ASIZB	1	Yahui Zhao | Jue Bai | Yu Wang | Chen Tian	Yahui Zhao | Dong Sheng | Qiuju Chen | Chen Tian | Xin Wang	48.07048146	86.34622201	530	WGS84	1	Habahe	China	Xinjiang Uygur Autonomous Region	Altay Prefecture	Habahe River
catalog:DQ:Fish:147	XJ-AL2022056	PreservedSpecimen	2022-07-11	Cyprinus carpio Linnaeus, 1758	Animalia	Chordata	Osteichthyes	Cypriniformes	Cyprinidae	Cyprininae	Cyprinus	species	ASIZB	2	Yahui Zhao | Jue Bai | Yu Wang | Chen Tian	Yahui Zhao | Dong Sheng | Qiuju Chen | Chen Tian | Xin Wang	48.00507766	85.70225776	412	WGS84	1	Habahe	China	Xinjiang Uygur Autonomous Region	Altay Prefecture	Bieliezeke River
catalog:DQ:Fish:148	XJ-AL2022057	PreservedSpecimen	2022-07-11	Abramis brama (Linnaeus, 1758)	Animalia	Chordata	Osteichthyes	Cypriniformes	Leuciscidae	Leuciscinae	Abramis	species	ASIZB	44	Yahui Zhao | Jue Bai | Yu Wang | Chen Tian	Yahui Zhao | Dong Sheng | Qiuju Chen | Chen Tian | Xin Wang	47.98992233	85.77184253	412	WGS84	1	Habahe	China	Xinjiang Uygur Autonomous Region	Altay Prefecture	Irtysh River
catalog:DQ:Fish:149	XJ-AL2022058	PreservedSpecimen	2022-07-11	Abramis brama (Linnaeus, 1758)	Animalia	Chordata	Osteichthyes	Cypriniformes	Leuciscidae	Leuciscinae	Abramis	species	ASIZB	10	Yahui Zhao | Jue Bai | Yu Wang | Chen Tian	Yahui Zhao | Dong Sheng | Qiuju Chen | Chen Tian | Xin Wang	48.00507766	85.70225776	412	WGS84	1	Habahe	China	Xinjiang Uygur Autonomous Region	Altay Prefecture	Bieliezeke River
catalog:DQ:Fish:150	XJ-AL2022059	PreservedSpecimen	2022-07-11	Abramis brama (Linnaeus, 1758)	Animalia	Chordata	Osteichthyes	Cypriniformes	Leuciscidae	Leuciscinae	Abramis	species	ASIZB	12	Yahui Zhao | Jue Bai | Yu Wang | Chen Tian	Yahui Zhao | Dong Sheng | Qiuju Chen | Chen Tian | Xin Wang	48.0144273	85.57493628	414	WGS84	1	Habahe	China	Xinjiang Uygur Autonomous Region	Altay Prefecture	Irtysh River
catalog:DQ:Fish:151	XJ-AL2022060	PreservedSpecimen	2022-07-11	Sander lucioperca (Linnaeus, 1758)	Animalia	Chordata	Osteichthyes	Perciformes	Percidae	Luciopercinae	Sander	species	ASIZB	3	Yahui Zhao | Jue Bai | Yu Wang | Chen Tian	Yahui Zhao | Dong Sheng | Qiuju Chen | Chen Tian | Xin Wang	48.0144273	85.57493628	414	WGS84	1	Habahe	China	Xinjiang Uygur Autonomous Region	Altay Prefecture	Irtysh River
